# Supplementary material for: Familienaufstellung als Einzelintervention im Gruppensetting bei chronisch-psychosozialen Konflikten: Kurz-, mittel- und langfristige Wirksamkeit
Source: Atypon-hosted journal article supplement (doi:10.1024/1661-4747/a000424), 2020-09-01
Supplement: 1661-4747_a000424_esm1.pdf [file 1661-4747_a000424_esm1.pdf]

ESM 1, Tabelle 1. Deskriptive Statistiken; Ergebnisse der ANOVAs mit Messwiederholung und der Gruppenvergleiche.

|                                                                                                            |                  | Demographie: <i>M</i> ( <i>SD</i> ) |                 |                  | ANOVA                                                   | Gruppenvergleiche                                        |                      |
|------------------------------------------------------------------------------------------------------------|------------------|-------------------------------------|-----------------|------------------|---------------------------------------------------------|----------------------------------------------------------|----------------------|
| <i>Studie 1: Randomisiert-kontrollierte Studie (RCT)</i>                                                   |                  |                                     |                 |                  |                                                         |                                                          |                      |
|                                                                                                            |                  | <b>Baseline</b>                     | <b>2 Wochen</b> | <b>4 Monate</b>  |                                                         | <b>Zwischen den Gruppen (FAS; WG)</b>                    |                      |
|                                                                                                            |                  |                                     |                 |                  |                                                         | <b>2 Wochen</b>                                          | <b>4 Monate</b>      |
| <b>EB-45</b>                                                                                               | FAS              | 49.94 (17.78)                       | 42.63 (17.39)   | 42.46(17.40)     | $F(1.83, 373.07) = 12.89,$<br>$p = .000, \eta^2 = .059$ | $F(1,204) = 9.35$                                        | $F(1,204) = 9.22$    |
|                                                                                                            | WG               | 49.91 (18.71)                       | 51.03 (20.22)   | 50.79 (18.83)    |                                                         | $p = .003, d = 0.45$                                     | $p = .003, d = 0.46$ |
| <b>FEP</b>                                                                                                 | FAS              | 2.15 (0.56)                         | 1.92 (0.51)     | 1.92 (0.53)      | $F(1.83, 371.37) = 9.81,$<br>$p = .000, \eta^2 = .046$  | $F(1,204) = 12.82$                                       | $F(1,204) = 11.24$   |
|                                                                                                            | WG               | 2.16 (0.57)                         | 2.21 (0.62)     | 2.20 (0.57)      |                                                         | $p = .000, d = 0.51$                                     | $p = .001, d = 0.51$ |
| <b>K-INK</b>                                                                                               | FAS              | 2.21 (0.56)                         | 2.02 (0.59)     | 2.03 (0.57)      | $F(1.92, 390.65) = 8.33,$<br>$p = .000, \eta^2 = .039$  | $F(1,204) = 14.78$                                       | $F(1,204) = 12.94$   |
|                                                                                                            | WG               | 2.29 (0.55)                         | 2.35 (0.62)     | 2.33 (0.59)      |                                                         | $p = .000, d = 0.55$                                     | $p = .000, d = 0.52$ |
| <b>EXIS</b>                                                                                                | FAS              | 4.07 (0.77)                         | 4.54 (0.74)     | 4.47 (0.78)      | $F(1.90, 386.51) = 17.28,$<br>$p = .000, \eta^2 = .078$ | $F(1,204) = 17.51$                                       | $F(1,204) = 13.17$   |
|                                                                                                            | WG               | 4.15 (0.76)                         | 4.07 (0.81)     | 4.05 (0.81)      |                                                         | $p = .000, d = 0.61$                                     | $p = .000, d = 0.53$ |
| <i>Studie 2: Verlaufsstudie zur FAS-Gruppe der RCT</i>                                                     |                  |                                     |                 |                  |                                                         |                                                          |                      |
|                                                                                                            |                  | <b>Baseline</b>                     | <b>8 Monate</b> | <b>12 Monate</b> |                                                         | <b>Innerhalb der Gruppe (FAS)</b>                        |                      |
|                                                                                                            |                  |                                     |                 |                  |                                                         | <b>2 Wochen</b>                                          | <b>4 Monate</b>      |
| <b>EB-45</b>                                                                                               | FAS              | 49.94 (17.78)                       | 42.63 (17.39)   | 41.30(17.67)     | $F(2, 206) = 21.49,$<br>$p = .000, \eta^2 = .173$       | $F(1, 103) = 23.65$                                      | $F(1, 103) = 34.62$  |
|                                                                                                            |                  |                                     |                 |                  |                                                         | $p = .000, d = 0.41$                                     | $p = .000, d = 0.49$ |
| <b>FEP</b>                                                                                                 | FAS              | 2.15 (0.56)                         | 1.94 (0.53)     | 1.88 (0.52)      | $F(1.85, 190.64) = 14.29,$<br>$p = .000, \eta^2 = .122$ | $F(1, 103) = 13.34$                                      | $F(1, 103) = 22.68$  |
|                                                                                                            |                  |                                     |                 |                  |                                                         | $p = .000, d = 0.39$                                     | $p = .001, d = 0.50$ |
| <b>K-INK</b>                                                                                               | FAS              | 2.21 (0.56)                         | 2.02 (0.54)     | 1.97 (0.54)      | $F(1.88, 194.03) = 13.40,$<br>$p = .000, \eta^2 = .115$ | $F(1, 103) = 13.48$                                      | $F(1, 103) = 21.48$  |
|                                                                                                            |                  |                                     |                 |                  |                                                         | $p = .000, d = 0.35$                                     | $p = .000, d = 0.44$ |
| <b>EXIS</b>                                                                                                | FAS              | 4.07 (0.77)                         | 4.53 (0.75)     | 4.50 (0.75)      | $F(1.79, 184.48) = 24.08,$<br>$p = .000, \eta^2 = .189$ | $F(1, 103) = 33.77$                                      | $F(1, 103) = 27.95$  |
|                                                                                                            |                  |                                     |                 |                  |                                                         | $p = .000, d = 0.61$                                     | $p = .000, d = 0.57$ |
| <i>Studie 3: Verlaufsstudie zur FAS- und WG-Gruppe der RCT (Kumulative Studie, WG mit nachheriger FAS)</i> |                  |                                     |                 |                  |                                                         |                                                          |                      |
|                                                                                                            |                  | <b>Baseline</b>                     | <b>5 Jahre</b>  |                  |                                                         | <b>Innerhalb der Gruppe (FAS+WG mit nachheriger FAS)</b> |                      |
|                                                                                                            |                  |                                     |                 |                  |                                                         | <b>5 Jahre</b>                                           |                      |
| <b>EB-45</b>                                                                                               | FAS <sub>K</sub> | 48.11 (17.47)                       | 46.07 (22.66)   |                  | $F(2.6, 347.15) = 5.76,$<br>$p = .001, \eta^2 = .041$   | $F(1, 136) = 23.65$                                      |                      |
|                                                                                                            |                  |                                     |                 |                  |                                                         | $p = .000, d = 0.10$                                     |                      |
| <b>FEP</b>                                                                                                 | FAS <sub>K</sub> | 2.11 (0.55)                         | 2.03 (0.49)     |                  | $F(2.86, 385.40) = 3.34,$<br>$p = .020, \eta^2 = .061$  | $F(1, 136) = 13.34$                                      |                      |
|                                                                                                            |                  |                                     |                 |                  |                                                         | $p = .000, d = 0.15$                                     |                      |

|              |                  |             |             |                                                   |                                             |
|--------------|------------------|-------------|-------------|---------------------------------------------------|---------------------------------------------|
| <b>K-INK</b> | FAS <sub>K</sub> | 2.23 (0.54) | 1.95 (0.52) | $F(3, 405) = 15.10,$<br>$p = .000, \eta^2 = .101$ | $F(1, 136) = 13.48$<br>$p = .000, d = 0.53$ |
| <b>EXIS</b>  | FAS <sub>K</sub> | 4.18 (0.74) | 4.53 (0.73) | $F(3, 408) = 13.80,$<br>$p = .001, \eta^2 = .092$ | $F(1, 136) = 33.77$<br>$p = .000, d = 0.48$ |

---

*Anmerkung.* EB-45 = Ergebnisfragebogen (dt. Version des Outcome Questionnaire, OQ-45); FEP = Fragebogen zur Erhebung von Psychotherapieerläufen; K-INK = Inkongruenzfragebogen (K-INK); EXIS = Fragebogen zum Erleben in privaten sozialen Systemen (Experience in Social Systems Questionnaire, personal domain); FAS<sub>K</sub> = kumulierte Stichprobe.
