# Supplementary material for: Familienaufstellung als Einzelintervention im Gruppensetting bei chronisch-psychosozialen Konflikten: Kurz-, mittel- und langfristige Wirksamkeit
Source: Atypon-hosted journal article supplement (doi:10.1024/1661-4747/a000424), 2020-09-01
Supplement: 1661-4747_a000424_esm2.pdf [file 1661-4747_a000424_esm2.pdf]

ESM 2, Tabelle 2. Klinische Bedeutsamkeit der Veränderungen nach Familienaufstellungsseminaren.

|                                                          |     | <b>Remission<br/>(Reliable Veränderung<br/>unterhalb des Grenzwertes)</b> | <b>Verbesserung<br/>Reliable Veränderung<br/>oberhalb<br/>des Grenzwertes</b> | <b>Keine<br/>reliable Veränderung</b> | <b>Verschlechterung<br/>(Reliable Veränderung<br/>mit dysfunktionaler<br/>Auswirkung)</b> |
|----------------------------------------------------------|-----|---------------------------------------------------------------------------|-------------------------------------------------------------------------------|---------------------------------------|-------------------------------------------------------------------------------------------|
|                                                          |     | <i>n (%)</i>                                                              | <i>n (%)</i>                                                                  | <i>n (%)</i>                          | <i>n (%)</i>                                                                              |
| <b>Studie 1: Randomisiert-kontrollierte Studie (RCT)</b> |     |                                                                           |                                                                               |                                       |                                                                                           |
| <b>2 Wochen</b>                                          |     |                                                                           |                                                                               |                                       |                                                                                           |
| <b>EB-45</b>                                             | FAS | 29 (28)                                                                   | 0 (0)                                                                         | 72 (69)                               | 3 (3)                                                                                     |
|                                                          | WG  | 6 (6)                                                                     | 0 (0)                                                                         | 91 (88)                               | 7 (7)                                                                                     |
| <b>FEP</b>                                               | FAS | 29 (28)                                                                   | 1 (1)                                                                         | 68 (65)                               | 6 (6)                                                                                     |
|                                                          | WG  | 7 (7)                                                                     | 2 (2)                                                                         | 75 (72)                               | 20 (19)                                                                                   |
| <b>K-INK</b>                                             | FAS | 25 (24)                                                                   | 1 (1)                                                                         | 76 (73)                               | 2 (2)                                                                                     |
|                                                          | WG  | 2 (2)                                                                     | 1 (1)                                                                         | 93 (89)                               | 8 (8)                                                                                     |
| <b>4 Monate</b>                                          |     |                                                                           |                                                                               |                                       |                                                                                           |
| <b>EB-45</b>                                             | FAS | 26 (25)                                                                   | 1 (1)                                                                         | 73 (70)                               | 4 (4)                                                                                     |
|                                                          | WG  | 8 (8)                                                                     | 1 (1)                                                                         | 82 (79)                               | 13 (13)                                                                                   |
| <b>FEP</b>                                               | FAS | 34 (33)                                                                   | 3 (3)                                                                         | 55 (53)                               | 12 (12)                                                                                   |
|                                                          | WG  | 20 (19)                                                                   | 1 (1)                                                                         | 60 (58)                               | 23 (22)                                                                                   |
| <b>K-INK</b>                                             | FAS | 25 (24)                                                                   | 2 (2)                                                                         | 67 (64)                               | 10 (10)                                                                                   |
|                                                          | WG  | 10 (10)                                                                   | 2 (2)                                                                         | 78 (75)                               | 14 (13)                                                                                   |
| <b>Studie 2: Verlaufsstudie zur FAS-Gruppe der RCT</b>   |     |                                                                           |                                                                               |                                       |                                                                                           |
| <b>8 Monate</b>                                          |     |                                                                           |                                                                               |                                       |                                                                                           |
| <b>EB-45</b>                                             | FAS | 35 (34)                                                                   | 1 (1)                                                                         | 63 (61)                               | 6 (7)                                                                                     |
| <b>FEP</b>                                               | FAS | 35 (34)                                                                   | 1 (1)                                                                         | 54 (52)                               | 14 (13)                                                                                   |
| <b>K-INK</b>                                             | FAS | 33 (32)                                                                   | 1 (1)                                                                         | 57 (55)                               | 13 (13)                                                                                   |
| <b>12 Monate</b>                                         |     |                                                                           |                                                                               |                                       |                                                                                           |
| <b>EB-45</b>                                             | FAS | 35 (34)                                                                   | 0 (0)                                                                         | 64 (62)                               | 5 (5)                                                                                     |
| <b>FEP</b>                                               | FAS | 40 (38)                                                                   | 2 (2)                                                                         | 48 (46)                               | 14 (13)                                                                                   |
| <b>K-INK</b>                                             | FAS | 32 (31)                                                                   | 1 (1)                                                                         | 63 (61)                               | 8 (8)                                                                                     |

Anmerkung. EB-45 = Ergebnisfragebogen (dt. Version des Outcome Questionnaire, OQ-45); FEP = Fragebogen zur Erhebung von Psychotherapieverläufen; K-INK = Inkongruenzfragebogen (K-INK).

ESM 2, Tabelle 2. Klinische Bedeutsamkeit der Veränderungen nach Familienaufstellungsseminaren (Fortsetzung).

|                                                                                                           |                  | <b>Remission<br/>(Reliable Veränderung<br/>unterhalb des Grenzwertes)</b> | <b>Verbesserung<br/>Reliable Veränderung<br/>oberhalb<br/>des Grenzwertes</b> | <b>Keine<br/>reliable Veränderung</b> | <b>Verschlechterung<br/>(Reliable Veränderung<br/>mit dysfunktionaler<br/>Auswirkung)</b> |
|-----------------------------------------------------------------------------------------------------------|------------------|---------------------------------------------------------------------------|-------------------------------------------------------------------------------|---------------------------------------|-------------------------------------------------------------------------------------------|
|                                                                                                           |                  | <i>n (%)</i>                                                              | <i>n (%)</i>                                                                  | <i>n (%)</i>                          | <i>n (%)</i>                                                                              |
| <i>Studie 3 Verlaufsstudie zur FAS- und WG-Gruppe der RCT (Kumulative Studie, WG mit nachheriger FAS)</i> |                  |                                                                           |                                                                               |                                       |                                                                                           |
| <i>5 Jahre</i>                                                                                            |                  |                                                                           |                                                                               |                                       |                                                                                           |
| <b>EB-45</b>                                                                                              | FAS <sub>K</sub> | 29 (28)                                                                   | 0 (0)                                                                         | 72 (69)                               | 3 (3)                                                                                     |
| <b>FEP</b>                                                                                                | FAS <sub>K</sub> | 29 (28)                                                                   | 1 (1)                                                                         | 68 (65)                               | 6 (6)                                                                                     |
| <b>K-INK</b>                                                                                              | FAS <sub>K</sub> | 25 (24)                                                                   | 1 (1)                                                                         | 76 (73)                               | 2 (2)                                                                                     |

*Anmerkung.* EB-45 = Ergebnisfragebogen (dt. Version des Outcome Questionnaire, OQ-45); FEP = Fragebogen zur Erhebung von Psychotherapieerläufen; K-INK = Inkongruenzfragebogen (K-INK); FAS<sub>K</sub>= kumulierte Stichprobe.
